# Supplementary material for: Impedimetric detection of pathogenic bacteria with bacteriophages using gold nanorod deposited graphite electrodes
Source: Royal Society of Chemistry journal article supplement (doi:10.1039/c6ra18884b), 2016-01-01
Supplement: c6ra18884b1.pdf [file c6ra18884b1.pdf]

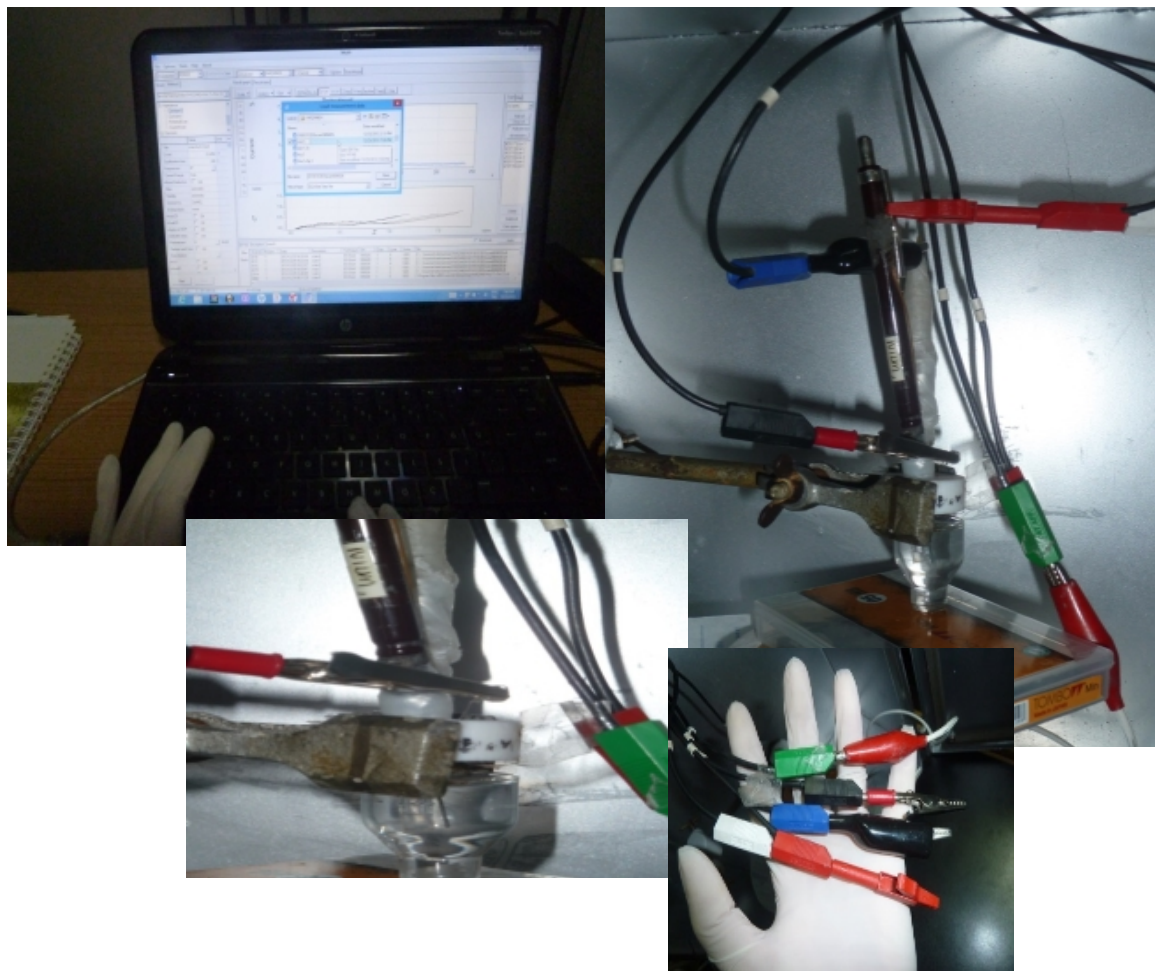

**SM-Fig.1. Electrochemical Impedance Spectroscopy (EIS) system used in this study with three electrodes; (i) a PGE, (ii) a Ag/AgCl/ 3M KCl reference electrode and (iii) a platinum wire as the auxiliary electrode. A typical test result recorded on the computer (upper left).**

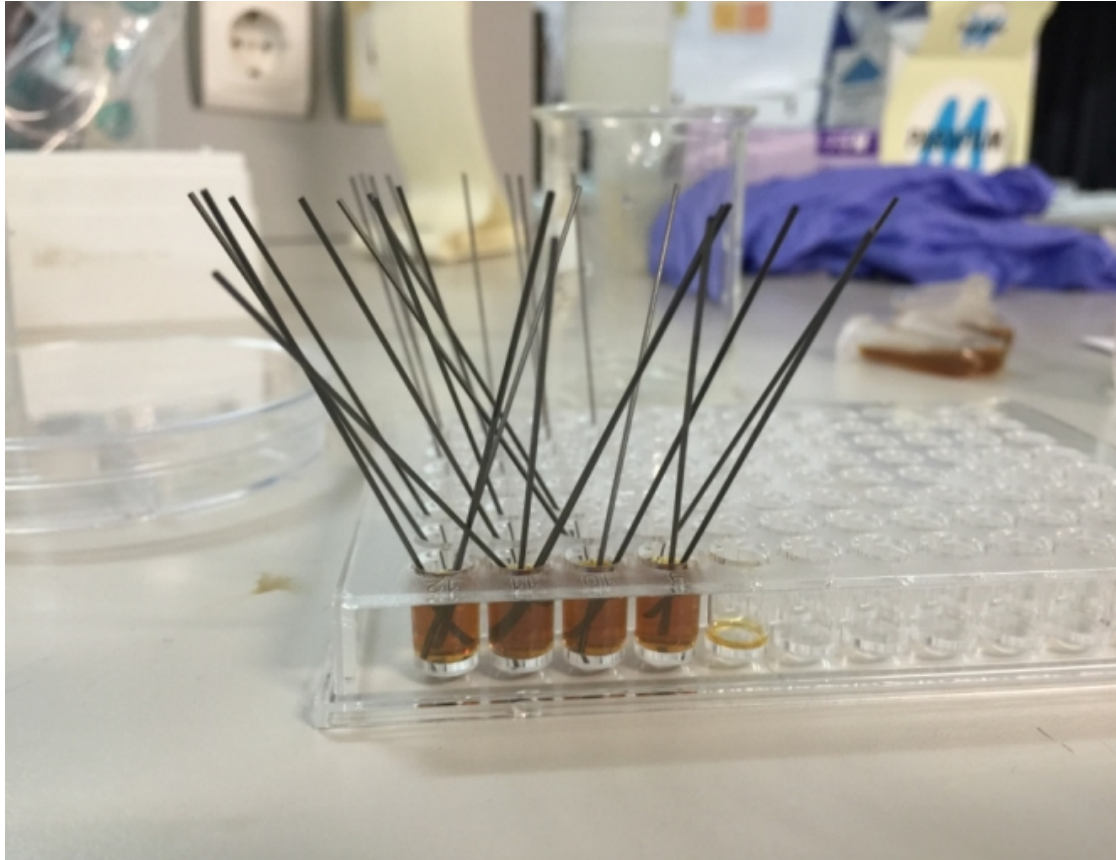

**SM-Fig.2.** Deposition of GNRs onto the PGE surface by simple incubation.
